# Supplementary material for: Tectonic controls on the ecosystem of the Mara River basin, East Africa, from geomorphological and spectral index analysis
Source: Copernicus journal article supplement (doi:10.5194/bg-20-1991-2023), 2023-05-30
Supplement: Supplementary file 1 [file bg-20-1991-2023-supplement.pdf]

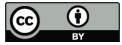

*Supplement of*

## **Tectonic controls on the ecosystem of the Mara River basin, East Africa, from geomorphological and spectral index analysis**

**Alina Lucia Ludat and Simon Kübler**

*Correspondence to:* Alina Lucia Ludat ([alina.ludat@lmu.de](mailto:alina.ludat@lmu.de)) and Simon Kübler ([s.kuebler@lmu.de](mailto:s.kuebler@lmu.de))

The copyright of individual parts of the supplement might differ from the article licence.

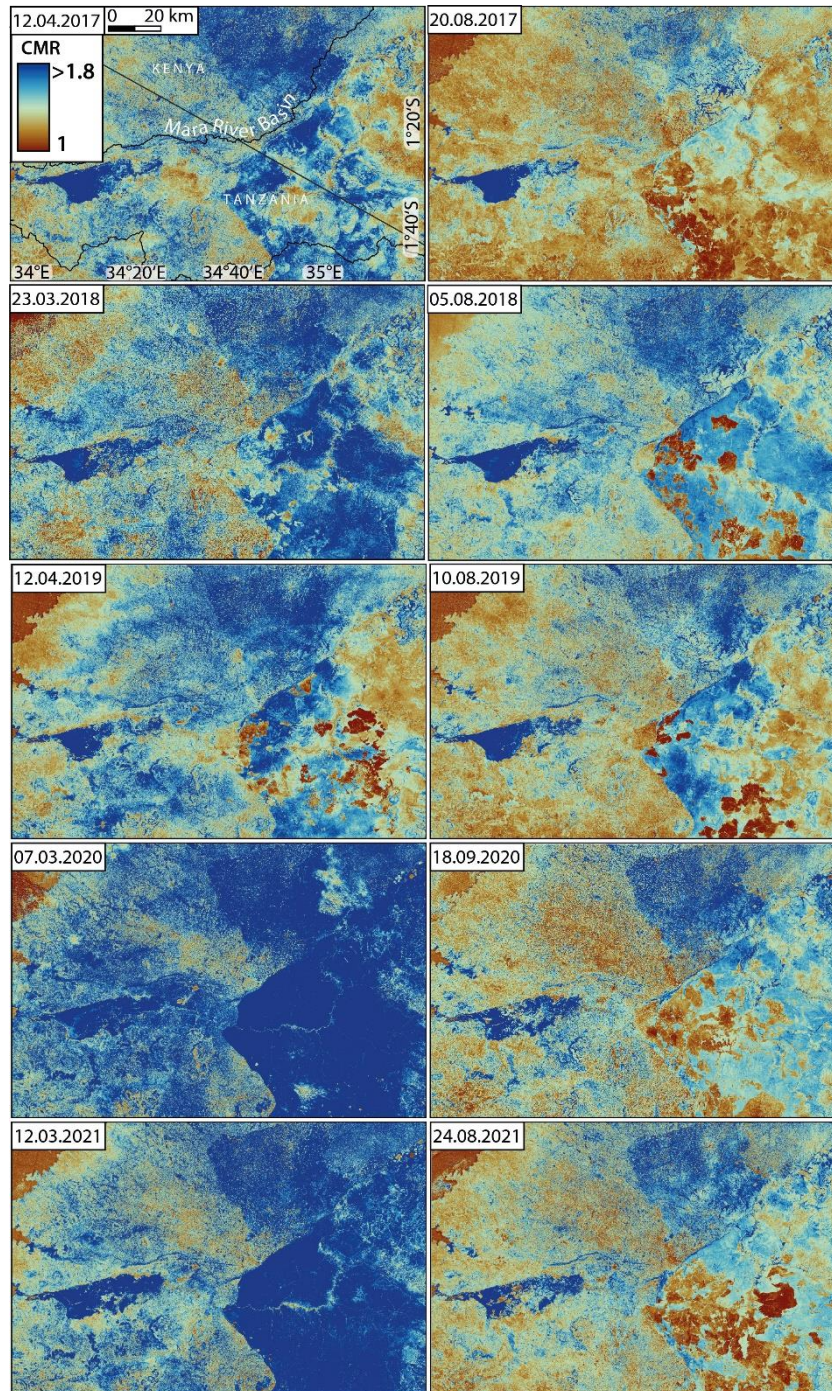

**Figure S1 Spatio-temporal distribution of Clay Mineral Ratio (CMR) in the Mara River Basin represented by 10 Sentinel-2 multispectral images from European Space Agency (ESA). For each year a rainy season (left side) and dry season (right side) scene was selected to highlight areas with perennially stable high clay mineral ratio.**

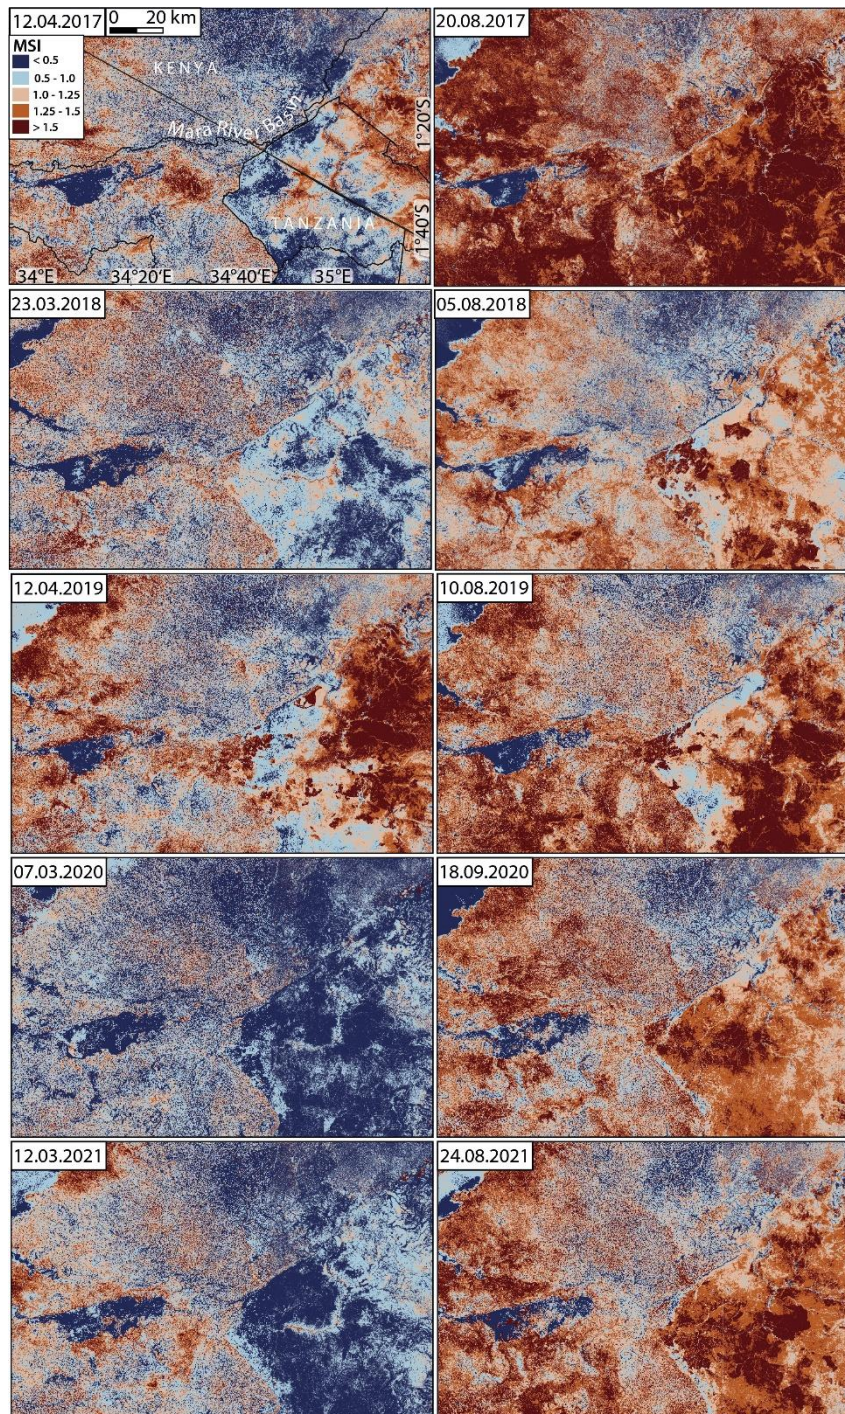

5

**Figure S2** Spatio-temporal distribution of Moisture Stress Index (MSI) in the Mara River Basin represented by 10 Sentinel-2 multispectral images from European Space Agency (ESA). For each year a rainy season (left side) and dry season (right side) scene was selected to highlight areas with perennially stable low moisture stress.
